# Supplementary material for: Formation mechanism of dysprosium-doped manganese carbonate nanoparticles by thermal decomposition
Source: Royal Society of Chemistry journal article supplement (doi:10.1039/c6ra20347g), 2016-01-01
Supplement: c6ra20347g1.pdf [file c6ra20347g1.pdf]

### Supplementary Information

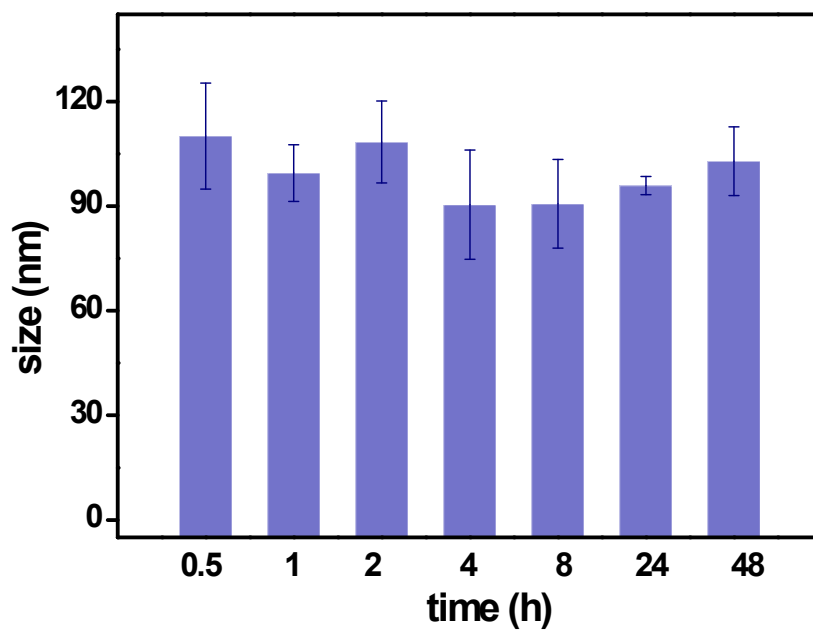

**Fig. S1** The hydrodynamic diameter of TETT modified Dy-doped MnCO<sub>3</sub> NPs at different time points.
